# Supplementary material for: Pathogen‐specific B‐cell receptors drive chronic lymphocytic leukemia by light‐chain‐dependent cross‐reaction with autoantigens
Source: PubMed Central journal article supplement (PMC5666309; doi:10.15252/emmm.201707732), 2017-09-12
Supplement: EMMM-9-1482-s001.pdf [file EMMM-9-1482-s001.pdf]

**Pathogen-specific B cell receptors drive chronic lymphocytic leukemia by light  
chain-dependent cross-reaction with autoantigens**

Nereida Jiménez de Oya, Marco De Giovanni, Jessica Fioravanti, Rudolf Übelhart,  
Pietro Di Lucia, Amleto Fiocchi, Stefano Iacovelli, Dimitar G. Efremov, Federico  
Caligaris-Cappio, Hassan Jumaa, Paolo Ghia, Luca G. Guidotti and Matteo Iannacone

**Appendix**

Appendix Table S1, page 1

| FIGURE 1A                                              |         |                  | FIGURE 1C                                                     |         |                  | FIGURE 2A                                                    |         |                  | FIGURE EV1B                                                                |         |                  |
|--------------------------------------------------------|---------|------------------|---------------------------------------------------------------|---------|------------------|--------------------------------------------------------------|---------|------------------|----------------------------------------------------------------------------|---------|------------------|
| Two-way ANOVA (Bonferroni's multiple comparison test)  | Summary | Adjusted P Value | One-way ANOVA (Bonferroni's multiple comparison test)         | Summary | Adjusted P Value | Two-way ANOVA (Bonferroni's multiple comparison test)        | Summary | Adjusted P Value | One-way ANOVA (Bonferroni's multiple comparison test)                      | Summary | Adjusted P Value |
| <b>Week 20</b>                                         |         |                  | <b>SPLEEN</b>                                                 |         |                  | <b>Week 20</b>                                               |         |                  | <b>PERITONEUM</b>                                                          |         |                  |
| V110YEN x E $\mu$ -TCL1 vs. E $\mu$ -TCL1              | *       | 0.0386           | D $\downarrow$ LMP2A x E $\mu$ -TCL1 vs. E $\mu$ -TCL1        | ***     | < 0.0001         | E $\mu$ -TCL1 vs. V110YEN x E $\mu$ -TCL1                    | .       | 0.0384           | E $\mu$ -TCL1 vs. KL25 x E $\mu$ -TCL1                                     | **      | 0.0088           |
| D $\downarrow$ LMP2A x E $\mu$ -TCL1 vs. E $\mu$ -TCL1 | ***     | 0.0001           | D $\downarrow$ LMP2A x E $\mu$ -TCL1 vs. KL25 x E $\mu$ -TCL1 | ***     | 0.0009           | <b>Week 24</b>                                               |         |                  | E $\mu$ -TCL1 vs. V110YEN x E $\mu$ -TCL1                                  | **      | 0.0036           |
|                                                        |         |                  | V110YEN x E $\mu$ -TCL1 vs. WT                                | ***     | 0.0007           | E $\mu$ -TCL1 vs. V110YEN x E $\mu$ -TCL1                    | ***     | < 0.0001         | E $\mu$ -TCL1 vs. D $\downarrow$ LMP2A x E $\mu$ -TCL1                     | **      | 0.0015           |
| <b>Week 24</b>                                         |         |                  | E $\mu$ -TCL1 vs. WT                                          | ***     | < 0.0001         | <b>Week 28</b>                                               |         |                  | <b>FIGURE EV1C</b>                                                         |         |                  |
| V110YEN x E $\mu$ -TCL1 vs. E $\mu$ -TCL1              | ***     | < 0.0001         | <b>INGUINAL LNs</b>                                           | .       | 0.0352           | E $\mu$ -TCL1 vs. V110YEN x E $\mu$ -TCL1                    | ***     | < 0.0001         | <b>LIVER</b>                                                               |         |                  |
| D $\downarrow$ LMP2A x E $\mu$ -TCL1 vs. E $\mu$ -TCL1 | ***     | < 0.0001         | E $\mu$ -TCL1 vs. WT                                          | ***     | 0.0017           | <b>Week 32</b>                                               |         |                  | E $\mu$ -TCL1 vs. WT                                                       | *       | 0.0322           |
|                                                        |         |                  | D $\downarrow$ LMP2A x E $\mu$ -TCL1 vs. E $\mu$ -TCL1        | ***     | < 0.0001         | E $\mu$ -TCL1 vs. V110YEN x E $\mu$ -TCL1                    | ***     | < 0.0001         | E $\mu$ -TCL1 vs. KL25 x E $\mu$ -TCL1                                     | ***     | 0.0002           |
| <b>Week 28</b>                                         |         |                  | V110YEN x E $\mu$ -TCL1 vs. WT                                | **      | 0.0025           | <b>Week 36</b>                                               |         |                  | E $\mu$ -TCL1 vs. V110YEN x E $\mu$ -TCL1                                  | ***     | < 0.0001         |
| KL25 x E $\mu$ -TCL1 vs. E $\mu$ -TCL1                 | ***     | < 0.0001         | E $\mu$ -TCL1 vs. WT                                          | ***     | < 0.0001         | E $\mu$ -TCL1 vs. V110YEN x E $\mu$ -TCL1                    | ***     | < 0.0001         | E $\mu$ -TCL1 vs. D $\downarrow$ LMP2A x E $\mu$ -TCL1                     | ***     | 0.0005           |
| V110YEN x E $\mu$ -TCL1 vs. E $\mu$ -TCL1              | ***     | < 0.0001         | KL25 x E $\mu$ -TCL1 vs. WT                                   | ***     | < 0.0001         | <b>FIGURE 2B</b>                                             |         |                  | <b>FIGURE EV2B</b>                                                         |         |                  |
| D $\downarrow$ LMP2A x E $\mu$ -TCL1 vs. E $\mu$ -TCL1 | ***     | < 0.0001         | <b>PERITONEUM</b>                                             |         |                  | <b>Log-rank (Mantel-Cox) test</b>                            | Summary | Adjusted P Value | <b>SPLEEN</b>                                                              |         |                  |
|                                                        |         |                  | D $\downarrow$ LMP2A x E $\mu$ -TCL1 vs. E $\mu$ -TCL1        | ***     | < 0.0001         | E $\mu$ -TCL1 vs. V110YEN x E $\mu$ -TCL1                    | ***     | < 0.0001         | E $\mu$ -TCL1 vs. V110YEN x E $\mu$ -TCL1                                  | .       | 0.0192           |
| <b>Week 32</b>                                         |         |                  | V110YEN x E $\mu$ -TCL1 vs. E $\mu$ -TCL1                     | ***     | < 0.0001         | <b>FIGURE 2C</b>                                             |         |                  | <b>INGUINAL LNs</b>                                                        |         |                  |
| D $\downarrow$ LMP2A x E $\mu$ -TCL1 vs. E $\mu$ -TCL1 | ***     | < 0.0001         | V110YEN x E $\mu$ -TCL1 vs. E $\mu$ -TCL1                     | ***     | < 0.0001         | <b>Two-way ANOVA (Bonferroni's multiple comparison test)</b> | Summary | Adjusted P Value | E $\mu$ -TCL1 vs. V110YEN x E $\mu$ -TCL1                                  | .       | 0.034            |
|                                                        |         |                  | V110YEN x E $\mu$ -TCL1 vs. E $\mu$ -TCL1                     | **      | 0.0066           | <b>Week 28</b>                                               |         |                  | E $\mu$ -TCL1 vs. V110YEN x E $\mu$ -TCL1                                  | **      | 0.0092           |
| <b>Week 36</b>                                         |         |                  | E $\mu$ -TCL1 vs. WT                                          | ***     | < 0.0001         | E $\mu$ -TCL1 vs. KL25 x E $\mu$ -TCL1                       | ***     | < 0.0001         | <b>LIVER</b>                                                               |         |                  |
| V110YEN x E $\mu$ -TCL1 vs. E $\mu$ -TCL1              | ***     | < 0.0001         | KL25 x E $\mu$ -TCL1 vs. WT                                   | ***     | < 0.0001         | <b>FIGURE EV3</b>                                            |         |                  | <b>PERITONEUM</b>                                                          |         |                  |
| D $\downarrow$ LMP2A x E $\mu$ -TCL1 vs. E $\mu$ -TCL1 | ***     | < 0.0001         |                                                               |         |                  | <b>Two-way ANOVA (Bonferroni's multiple comparison test)</b> | Summary | Adjusted P Value | E $\mu$ -TCL1 vs. V110YEN x E $\mu$ -TCL1                                  | **      | 0.0073           |
|                                                        |         |                  |                                                               |         |                  | <b>E<math>\mu</math>-TCL1 vs E<math>\mu</math>-TCL1+LCMV</b> |         |                  | <b>FIGURE EV3</b>                                                          |         |                  |
|                                                        |         |                  |                                                               |         |                  | <b>Week 20</b>                                               |         |                  | <b>E<math>\mu</math>-TCL1 vs E<math>\mu</math>-TCL1+LCMV</b>               | **      | 0.0028           |
|                                                        |         |                  |                                                               |         |                  | <b>Week 24</b>                                               |         |                  | <b>Week 20</b>                                                             | ***     | < 0.0001         |
|                                                        |         |                  |                                                               |         |                  | <b>Week 28</b>                                               |         |                  | <b>Week 24</b>                                                             | ***     | < 0.0001         |
|                                                        |         |                  |                                                               |         |                  |                                                              |         |                  | <b>Week 28</b>                                                             | ***     | < 0.0001         |
|                                                        |         |                  |                                                               |         |                  |                                                              |         |                  | <b>KL25 x E<math>\mu</math>-TCL1 vs KL25 x E<math>\mu</math>-TCL1+LCMV</b> | ***     | < 0.0001         |
|                                                        |         |                  |                                                               |         |                  |                                                              |         |                  | <b>Week 28</b>                                                             | ***     | < 0.0001         |

  

| FIGURE 1B                                                       |         |                  |
|-----------------------------------------------------------------|---------|------------------|
| Log-rank (Mantel-Cox) test                                      | Summary | Adjusted P Value |
| E $\mu$ -TCL1 vs V110YEN x E $\mu$ -TCL1                        | ***     | < 0.0001         |
| E $\mu$ -TCL1 vs D $\downarrow$ LMP2A x E $\mu$ -TCL1           | ***     | < 0.0001         |
| E $\mu$ -TCL1 vs WT                                             | ***     | < 0.0001         |
| V110YEN x E $\mu$ -TCL1 vs D $\downarrow$ LMP2A x E $\mu$ -TCL1 | **      | 0.004            |
