# Supplementary material for: Pathogen‐specific B‐cell receptors drive chronic lymphocytic leukemia by light‐chain‐dependent cross‐reaction with autoantigens
Source: PubMed Central journal article supplement (PMC5666309; doi:10.15252/emmm.201707732), 2017-09-12
Supplement: EMMM-9-1482-s002.pdf [file EMMM-9-1482-s002.pdf]

## Expanded View Figures

### Figure EV1. Characterization of KL25 × Eμ-TCL1, VI10YEN × Eμ-TCL1, and D<sub>H</sub>LMP2A × Eμ-TCL1 mice.

- A TCL1 expression in the spleen of 8-week-old WT (gray), Eμ-TCL1 (black), KL25 × Eμ-TCL1 (red), VI10YEN × Eμ-TCL1 (blue), and D<sub>H</sub>LMP2A × Eμ-TCL1 (green) male mice analyzed by RT-qPCR. *n* = 3. Data are representative of more than three independent experiments.
- B Concentration of CD5<sup>+</sup> CD19<sup>+</sup> cells per ml of blood and peritoneal wash of 8-week-old WT (gray), Eμ-TCL1 (black), KL25 × Eμ-TCL1 (red), VI10YEN × Eμ-TCL1 (blue), and D<sub>H</sub>LMP2A × Eμ-TCL1 (green) male mice. *n* = 6 (WT), 8 (Eμ-TCL1), 9 (KL25 × Eμ-TCL1), 8 (VI10YEN × Eμ-TCL1), and 9 (D<sub>H</sub>LMP2A × Eμ-TCL1).
- C Absolute numbers of CD5<sup>+</sup> CD19<sup>+</sup> cells in the indicated organs of the same mice described in (B).
- D Representative flow cytometry plots showing transgenic BCR expression in B1a (CD19<sup>+</sup> CD5<sup>+</sup> CD23<sup>-</sup>), B1b (CD19<sup>+</sup> CD5<sup>-</sup> CD23<sup>-</sup>), and B2 (CD19<sup>+</sup> CD5<sup>-</sup> CD23<sup>+</sup>) cells from 8-week-old WT (top panel) and KL25 × Eμ-TCL1 (bottom panel) male mice. Results are representative of more than 10 independent experiments.
- E Representative flow cytometry plots showing transgenic BCR expression in B1a (CD19<sup>+</sup> CD5<sup>+</sup> CD23<sup>-</sup>), B1b (CD19<sup>+</sup> CD5<sup>-</sup> CD23<sup>-</sup>), and B2 (CD19<sup>+</sup> CD5<sup>-</sup> CD23<sup>+</sup>) cells from 8-week-old WT (top panel) and VI10YEN × Eμ-TCL1 (bottom panel) male mice. Results are representative of more than 10 independent experiments.
- F, G Representative flow cytometry plots showing proliferation (assessed by CFSE dilution, left panels) and activation (assessed by CD25 and CD69 upregulation, middle and right panels, respectively) of KL25 × Eμ-TCL1 (F) or VI10YEN × Eμ-TCL1 (G) B cells exposed or not to inactivated LCMV or VSV, respectively. Results are representative of three independent experiments.

Data information: Results are expressed as mean + SEM. \**P* < 0.05, \*\**P* < 0.01, \*\*\**P* < 0.001. Exact *P*-values for each experiment are reported in Appendix Table S1. One-way ANOVA (Bonferroni's multiple comparison) was used in (A–C). Source data are available online for this figure.

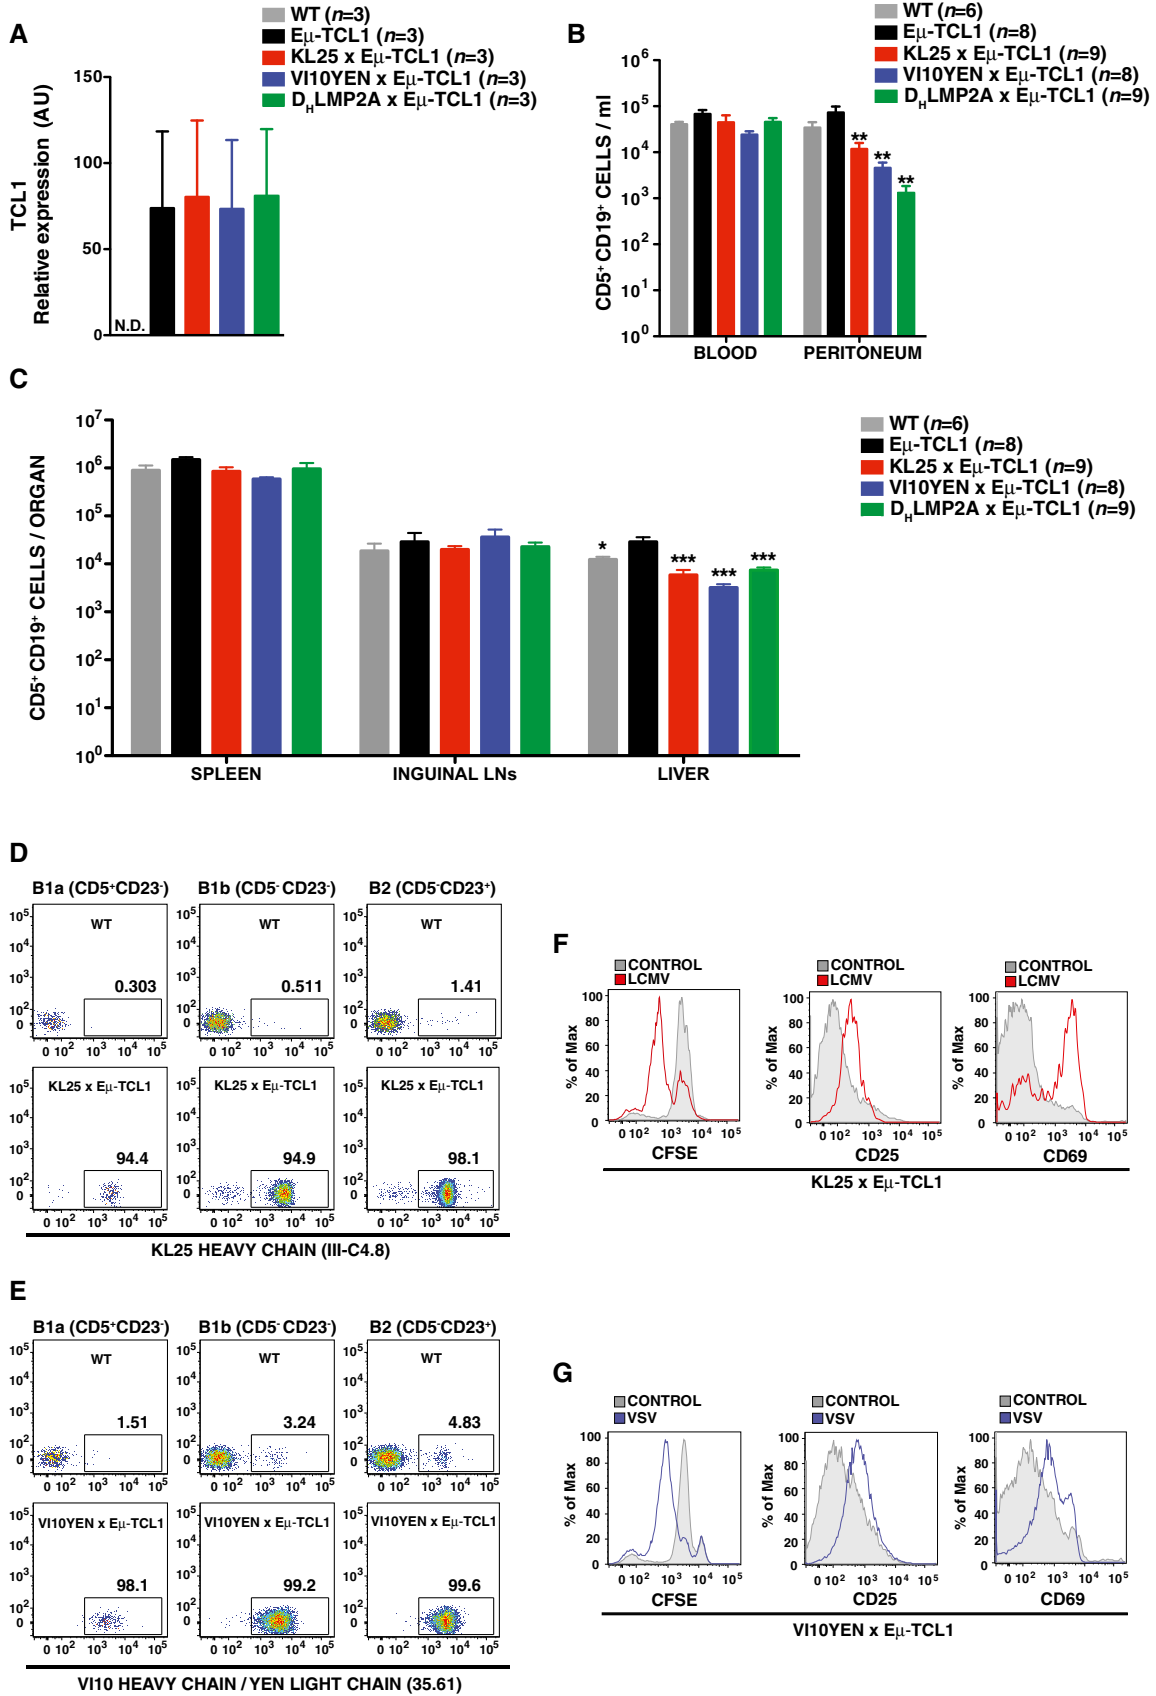

Figure EV1.

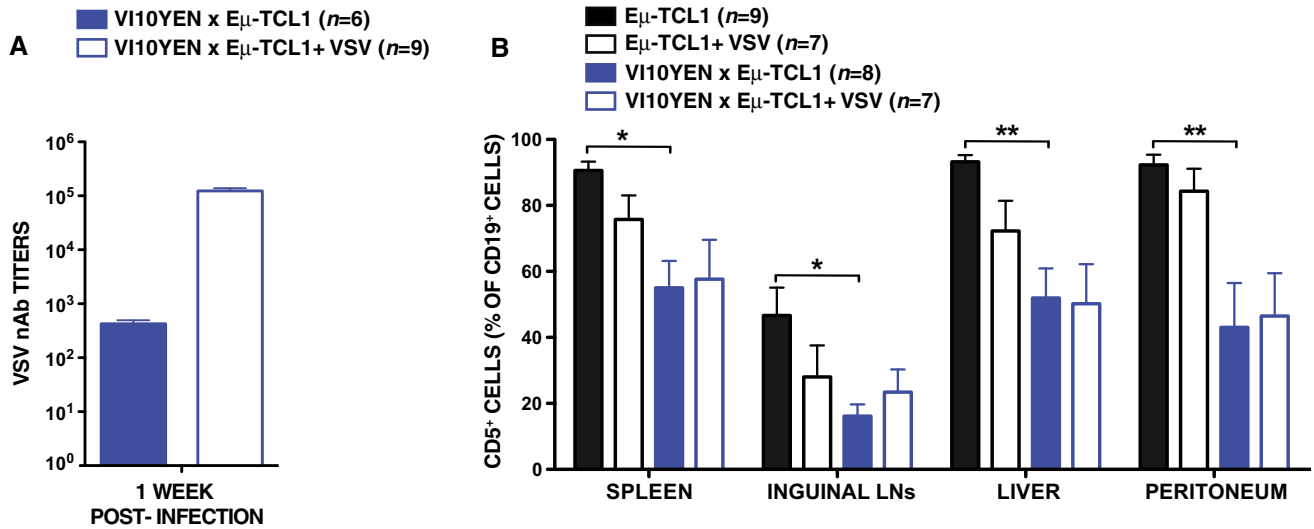

**Figure EV2. VSV infection does not affect CLL development or progression.**

A VSV neutralizing antibody (nAb) titers in the serum of VI10YEN  $\times$  E $\mu$ -TCL1 9-week-old male mice that were infected (open bars) or not (closed bars) with VSV 7 days earlier.  $n = 6$  (VI10YEN  $\times$  E $\mu$ -TCL1) and 9 (VI10YEN  $\times$  E $\mu$ -TCL1 + VSV).

B Percentage of CD5<sup>+</sup> cells (out of total CD19<sup>+</sup> cells) in the indicated organs of E $\mu$ -TCL1 (black) and VI10YEN  $\times$  E $\mu$ -TCL1 (blue) male mice that were infected (open bars) or not (closed bars) with  $10^6$  p.f.u. of VSV Indiana at 8 weeks of age and sacrificed 28 weeks later.  $n = 9$  (E $\mu$ -TCL1), 7 (E $\mu$ -TCL1 + VSV), 8 (VI10YEN  $\times$  E $\mu$ -TCL1), 7 (VI10YEN  $\times$  E $\mu$ -TCL1 + VSV). One-way ANOVA (Bonferroni's multiple comparison).

Data information: Results are expressed as mean + SEM. \* $P < 0.05$ , \*\* $P < 0.01$ . Exact  $P$ -values for each experiment are reported in Appendix Table S1. Source data are available online for this figure.

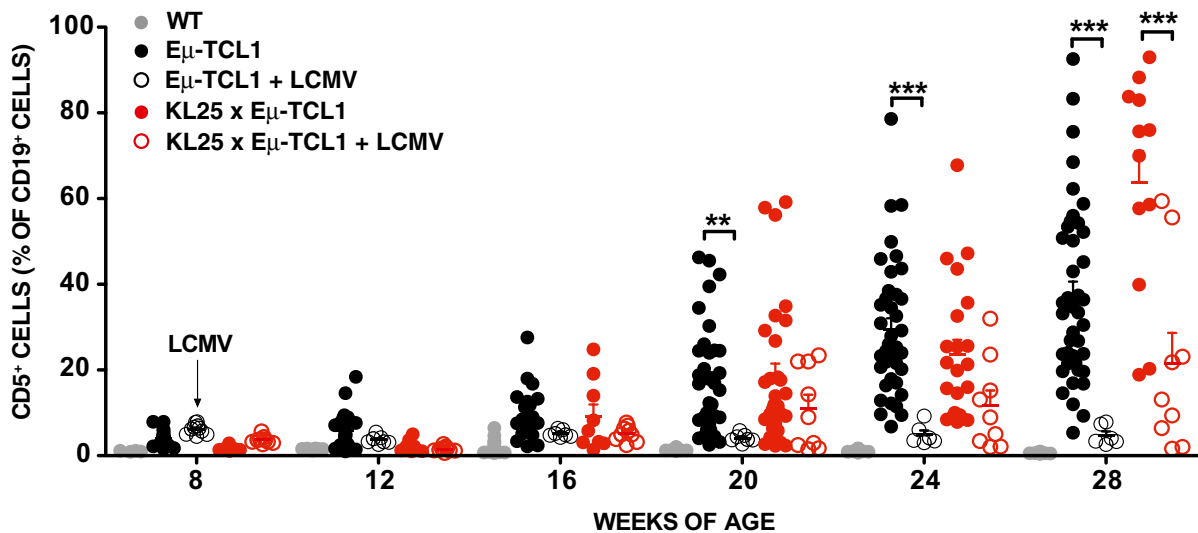

**Figure EV3. LCMV infection prevents CLL development in E $\mu$ -TCL1 mice.**

Percentage of CD5<sup>+</sup> cells (out of total CD19<sup>+</sup> peripheral blood leukocytes) over time in WT (gray) and in E $\mu$ -TCL1 (black) male mice that were infected (open symbols) or not (closed symbols) with LCMV.  $n = 4-20$  (WT), 16-45 (E $\mu$ -TCL1), 6-10 (E $\mu$ -TCL1 + LCMV), 8-29 (KL25  $\times$  E $\mu$ -TCL1), 9-11 (KL25  $\times$  E $\mu$ -TCL1 + LCMV). Please note that the uninfected WT, E $\mu$ -TCL1, and KL25  $\times$  E $\mu$ -TCL1 controls are the same as the ones reported in Fig 1A. Results are expressed as mean + SEM. \*\* $P < 0.01$ , \*\*\* $P < 0.001$ . Exact  $P$ -values for each experiment are reported in Appendix Table S1. Two-way ANOVA (Bonferroni's multiple comparison) was used.

Source data are available online for this figure.

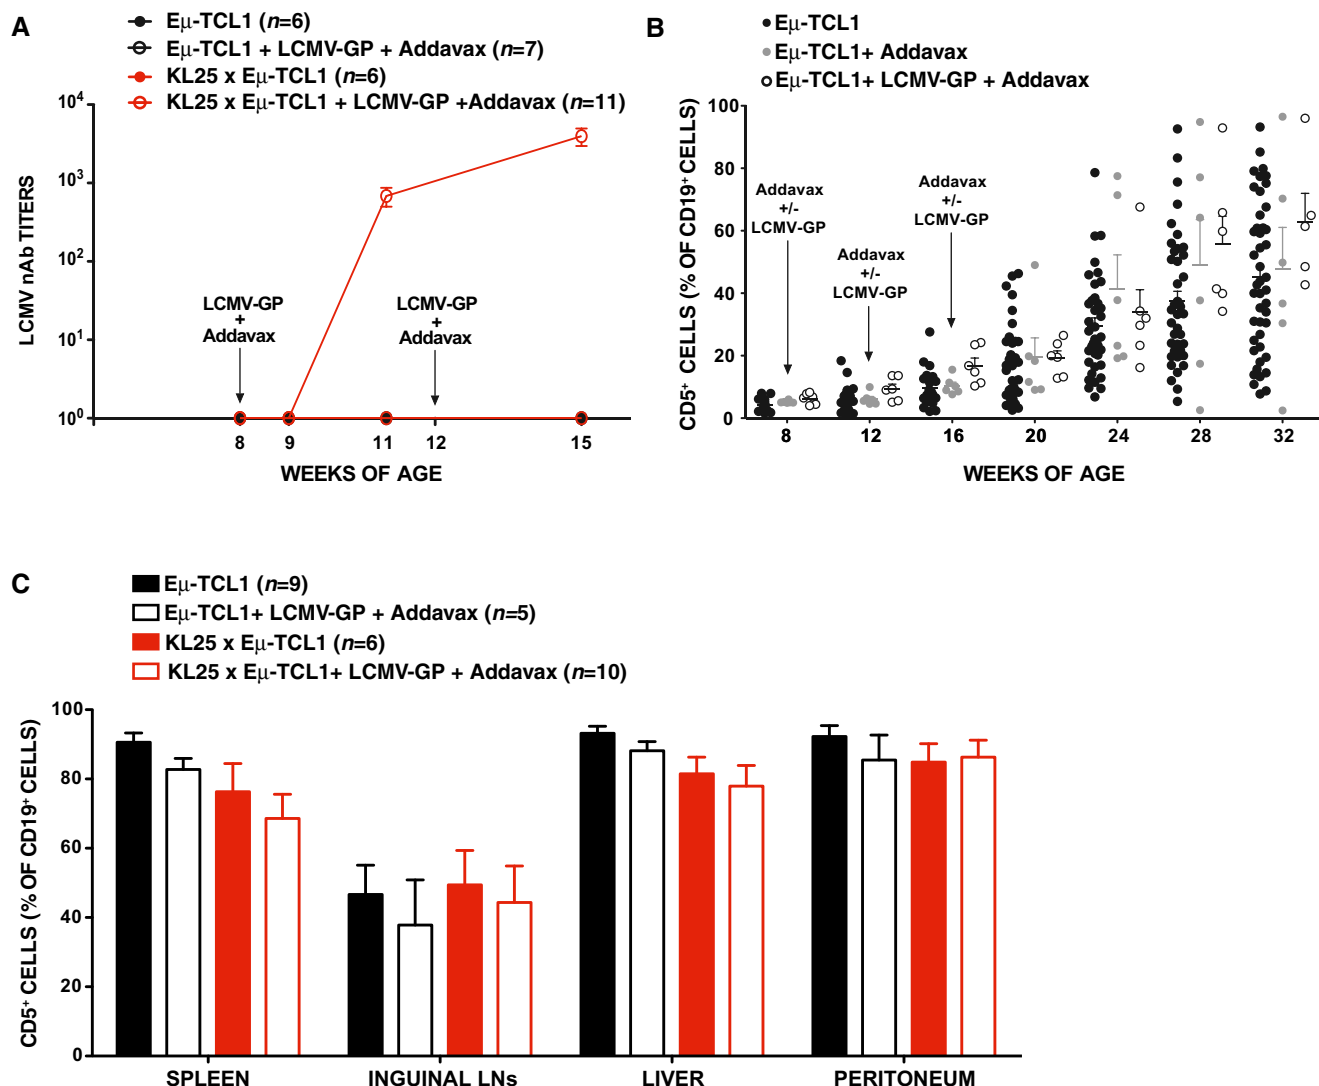

**Figure EV4. Immunization with LCMV-GP does not affect CLL development or progression.**

A LCMV neutralizing antibody (nAb) titers over time in the serum of E $\mu$ -TCL1 (black) and KL25  $\times$  E $\mu$ -TCL1 (red) male mice that were immunized (open symbols) or not (closed symbols) with LCMV-GP + Addavax. n = 6 (E $\mu$ -TCL1), 7 (E $\mu$ -TCL1 + LCMV-GP + Addavax), 6 (KL25  $\times$  E $\mu$ -TCL1), 11 (KL25  $\times$  E $\mu$ -TCL1 + LCMV-GP + Addavax).

B Percentage of CD5<sup>+</sup> cells (out of total CD19<sup>+</sup> peripheral blood leukocytes) over time in control E $\mu$ -TCL1 mice (black symbols) or in mice that were injected intramuscularly with Addavax (gray) or with LCMV-GP + Addavax (open symbols).

C Percentage of CD5<sup>+</sup> cells (out of total CD19<sup>+</sup> cells) in the indicated organs of E $\mu$ -TCL1 (black) and KL25  $\times$  E $\mu$ -TCL1 (red) mice that were immunized (open bars) or not (closed bars) with LCMV-GP + Addavax and sacrificed 24 weeks after the first immunization. n = 9 (E $\mu$ -TCL1), 5 (E $\mu$ -TCL1 + LCMV-GP + Addavax), 6 (KL25  $\times$  E $\mu$ -TCL1), 10 (KL25  $\times$  E $\mu$ -TCL1 + LCMV-GP + Addavax).

Data information: Results are expressed as mean + SEM.

Source data are available online for this figure.

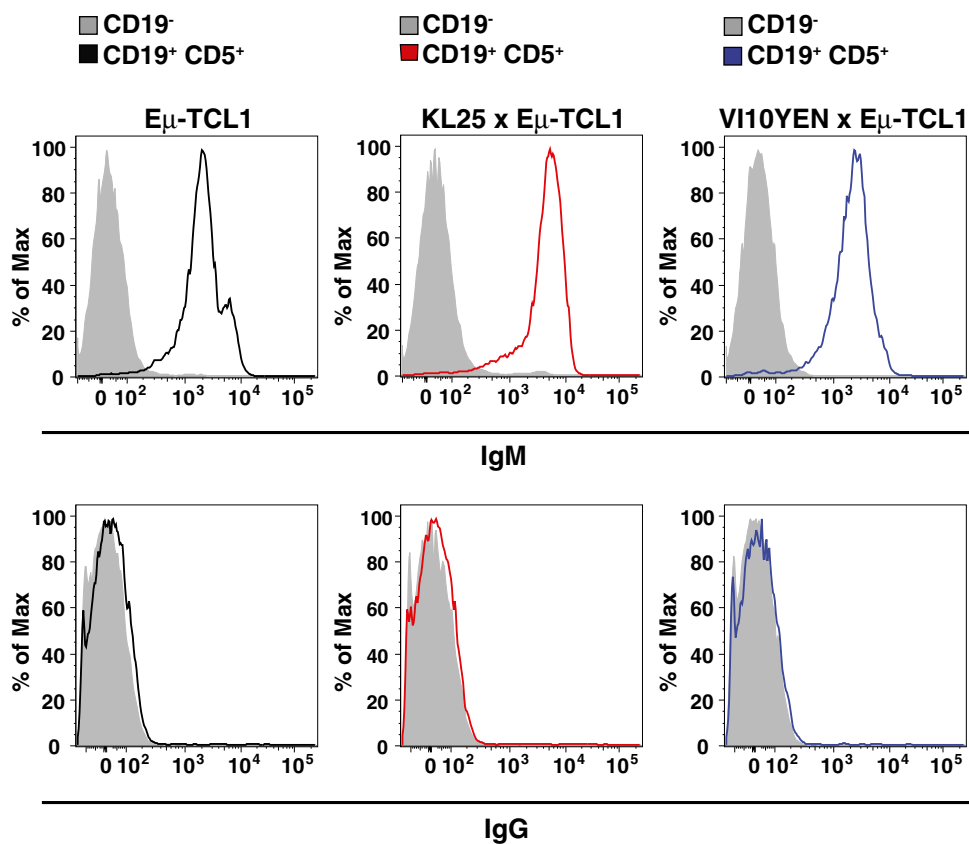

**Figure EV5.** CLL clones in E $\mu$ -TCL1, KL25  $\times$  E $\mu$ -TCL1, and VI10YEN  $\times$  E $\mu$ -TCL1 mice express IgM.

Representative flow cytometry plots of IgM (top panels) and IgG (bottom panels) expressions in CD19<sup>-</sup> cells (gray) and CD19<sup>+</sup> CD5<sup>+</sup> CLL cells (blue) in peripheral blood leukocytes isolated from 36-week-old E $\mu$ -TCL1 (left panels), KL25  $\times$  E $\mu$ -TCL1 (middle panels), and VI10YEN  $\times$  E $\mu$ -TCL1 (right panels) male mice.
