# Supplementary material for: Pathogen‐specific B‐cell receptors drive chronic lymphocytic leukemia by light‐chain‐dependent cross‐reaction with autoantigens
Source: PubMed Central journal article supplement (PMC5666309; doi:10.15252/emmm.201707732), 2017-09-12
Supplement: EMMM-9-1482-s008.pdf [file EMMM-9-1482-s008.pdf]

FIG 1C

| ORGANS       | WT   |      |      |      |      |      |
|--------------|------|------|------|------|------|------|
| SPLEEN       | 4.87 | 6.54 | 4.34 | 2.89 | 5.47 | 7.77 |
| INGUINAL LNs | 4.96 | 4.94 | 6.47 | 3.92 | 3.7  | 5.33 |
| LIVER        | 1.93 | 2.74 | 2.38 | 2.11 | 1.51 | 1.85 |
| PERITONEUM   | 16   | 10.3 | 20   | 10.8 | 19   | 17.8 |

| ORGANS       | E $\mu$ -TCL1 |       |       |       |       |       |       |       |       |      |      |      |      |      |
|--------------|---------------|-------|-------|-------|-------|-------|-------|-------|-------|------|------|------|------|------|
| SPLEEN       | 37.6          | 64.9  | 50.8  | 63.9  | 83.14 | 79.21 | 98.1  | 78.7  | 93.6  | 87.1 | 85.7 | 99.1 | 95.9 | 97.9 |
| INGUINAL LNs | 13.34         | 16.98 | 12.1  | 19.54 | 16.7  | 23.1  | 74.95 | 37.96 | 27.84 | 26.5 | 65.4 | 91.3 | 22.8 | 50.2 |
| LIVER        | 40.3          | 72.31 | 26.4  | 65.79 | 89.07 | 85.06 | 98.11 | 82    | 93.8  | 94.1 | 96.7 | 99.6 | 91.2 | 98.2 |
| PERITONEUM   | 88.76         | 93.04 | 75.31 | 97.1  | 93.4  | 94.11 | 94.94 | 92.61 | 96.7  | 67.9 | 94.8 | 99.2 | 93.4 | 96.8 |

| ORGANS       | KL25 x E $\mu$ -TCL1 |       |       |       |        |       |       |       |      |       |       |      |      |  |
|--------------|----------------------|-------|-------|-------|--------|-------|-------|-------|------|-------|-------|------|------|--|
| SPLEEN       | 68.6                 | 69.9  | 82.09 | 52.3  | 65.74  | 53.1  | 58.58 | 54.9  | 95.1 | 84.6  | 88.5  | 49.1 | 87.6 |  |
| INGUINAL LNs | 17.7                 | 20.6  | 19.1  | 7.6   | 18.5   | 41.5  | 31.5  | 20    | 31.3 | 22.26 | 50.31 | 60.7 | 90.6 |  |
| LIVER        | 25.7                 | 39.5  | 60.3  | 41.5  | 55.33  | 60.9  | 46.73 | 62.4  | 93.9 | 82.71 | 81.87 | 78.2 | 91.5 |  |
| PERITONEUM   | 86.92                | 49.94 | 77.36 | 78.59 | 93.111 | 92.96 | 62.88 | 77.78 | 89.9 | 63.33 | 96.5  | 74.2 | 92.2 |  |

| ORGANS       | VI10Yen x E $\mu$ -TCL1 |      |      |      |      |      |      |      |
|--------------|-------------------------|------|------|------|------|------|------|------|
| SPLEEN       | 75.2                    | 84.3 | 36.9 | 16   | 42.1 | 60.4 | 50.1 | 75.1 |
| INGUINAL LNs | 11.9                    | 22.7 | 5.58 | 13.3 | 2.46 | 21.6 | 18.9 | 33   |
| LIVER        | 86.8                    | 91.5 | 36.9 | 18.5 | 37.6 | 44.9 | 41.3 | 57.9 |
| PERITONEUM   | 65.6                    | 91.5 | 83.6 | 2.61 | 10.7 | 7.35 | 13.2 | 70   |

| ORGANS       | D <sub>H</sub> LMP2A x E $\mu$ -TCL1 |      |      |      |      |      |      |      |      |      |       |      |  |
|--------------|--------------------------------------|------|------|------|------|------|------|------|------|------|-------|------|--|
| SPLEEN       | 50.9                                 | 68.2 | 20   | 87.6 | 59.8 | 30.9 | 9.92 | 18.4 | 84   | 18.7 | 9.38  | 12.9 |  |
| INGUINAL LNs | 13                                   | 41.3 | 6.72 | 80.6 | 12.3 | 36.9 | 5.55 | 13.2 | 21.6 | 9.93 | 3.66  | 4.51 |  |
| LIVER        | 41                                   | 46.5 | 10.8 | 91   | 42.3 | 12.9 | 10.7 | 10.7 | 76.9 | 12.3 | 3.65  | 3.68 |  |
| PERITONEUM   | 4.59                                 | 45.1 | 1.33 | 95.2 | 4.92 | 3.83 | 1.77 | 2.09 | 64.8 | 1.44 | 0.716 | 2.68 |  |
