# Supplementary material for: Pathogen‐specific B‐cell receptors drive chronic lymphocytic leukemia by light‐chain‐dependent cross‐reaction with autoantigens
Source: PubMed Central journal article supplement (PMC5666309; doi:10.15252/emmm.201707732), 2017-09-12
Supplement: EMMM-9-1482-s010.pdf [file EMMM-9-1482-s010.pdf]

FIG 2B

| Weeks | Eμ-TCL1 | Eμ-TCL1 + VSV | VI10Yen x Eμ-TCL1 | VI10YEN x Eμ-TCL1 + VSV |
|-------|---------|---------------|-------------------|-------------------------|
| 22    | 1       |               |                   |                         |
| 24    | 1       |               |                   |                         |
| 21    | 1       |               |                   |                         |
| 24    | 1       |               |                   |                         |
| 22    | 1       |               |                   |                         |
| 20    | 1       |               |                   |                         |
| 20    | 1       |               |                   |                         |
| 25    | 1       |               |                   |                         |
| 24    | 1       |               |                   |                         |
| 19    | 1       |               |                   |                         |
| 19    | 1       |               |                   |                         |
| 27    | 1       |               |                   |                         |
| 22    | 1       |               |                   |                         |
| 18    | 1       |               |                   |                         |
| 24    | 1       |               |                   |                         |
| 19    | 1       |               |                   |                         |
| 16    | 1       |               |                   |                         |
| 36    | 1       |               |                   |                         |
| 30    | 1       |               |                   |                         |
| 25    | 1       |               |                   |                         |
| 14    | 1       |               |                   |                         |
| 22    | 1       |               |                   |                         |
| 18    | 1       |               |                   |                         |
| 22    | 1       |               |                   |                         |
| 30    | 1       |               |                   |                         |
| 24    | 1       |               |                   |                         |
| 34    | 1       |               |                   |                         |
| 15    | 1       |               |                   |                         |
| 36    | 1       |               |                   |                         |
| 20    | 1       |               |                   |                         |
| 20    | 1       |               |                   |                         |
| 22    | 1       |               |                   |                         |
| 22    | 1       |               |                   |                         |
| 22    | 1       |               |                   |                         |
| 25    | 1       |               |                   |                         |
| 25    | 1       |               |                   |                         |
| 30    | 1       |               |                   |                         |
| 27    | 1       |               |                   |                         |
| 35    | 1       |               |                   |                         |
| 27    | 1       |               |                   |                         |
| 35    | 1       |               |                   |                         |
| 27    | 1       |               |                   |                         |
| 22    | 1       |               |                   |                         |
| 20    | 1       |               |                   |                         |
| 25    | 1       |               |                   |                         |
| 18    | 1       |               |                   |                         |
| 25    | 1       |               |                   |                         |
| 29    |         |               | 1                 |                         |
| 29    |         |               | 1                 |                         |
| 36    |         |               | 0                 |                         |
| 36    |         |               | 0                 |                         |
| 30    |         |               | 1                 |                         |
| 36    |         |               | 0                 |                         |
| 36    |         |               | 0                 |                         |
| 36    |         |               | 1                 |                         |
| 29    |         |               | 1                 |                         |
| 36    |         |               | 0                 |                         |
| 35    |         |               | 0                 |                         |
| 29    |         |               | 1                 |                         |
| 34    |         |               | 1                 |                         |
| 36    |         |               | 0                 |                         |
| 34    |         |               | 0                 |                         |
| 25    |         |               | 1                 |                         |
| 36    |         |               | 0                 |                         |
| 29    |         |               | 1                 |                         |
| 34    |         |               | 1                 |                         |
| 31    |         |               | 1                 |                         |
| 35    |         |               |                   | 0                       |
| 32    |         |               |                   | 1                       |
| 19    |         |               |                   | 1                       |
| 25    |         |               |                   | 1                       |
| 29    |         |               |                   | 1                       |
| 35    |         |               |                   | 0                       |
| 29    |         |               |                   | 1                       |
| 36    |         |               |                   | 0                       |
| 25    |         | 1             |                   |                         |
| 19    |         | 1             |                   |                         |
| 36    |         | 0             |                   |                         |
| 17    |         | 1             |                   |                         |
| 21    |         | 1             |                   |                         |
| 32    |         | 1             |                   |                         |
| 27    |         | 1             |                   |                         |
| 29    |         | 1             |                   |                         |
| 33    |         | 1             |                   |                         |
