# Supplementary material for: Pathogen‐specific B‐cell receptors drive chronic lymphocytic leukemia by light‐chain‐dependent cross‐reaction with autoantigens
Source: PubMed Central journal article supplement (PMC5666309; doi:10.15252/emmm.201707732), 2017-09-12
Supplement: EMMM-9-1482-s012.pdf [file EMMM-9-1482-s012.pdf]

FIG 2D

| Weeks | E $\mu$ -TCL1 | E $\mu$ -TCL1 + LCMV-GP + Addavax | KL25 x E $\mu$ -TCL1 | KL25 x E $\mu$ -TCL1 + LCMV-GP + Addavax |
|-------|---------------|-----------------------------------|----------------------|------------------------------------------|
| 22    | 1             |                                   |                      |                                          |
| 24    | 1             |                                   |                      |                                          |
| 21    | 1             |                                   |                      |                                          |
| 24    | 1             |                                   |                      |                                          |
| 22    | 1             |                                   |                      |                                          |
| 20    | 1             |                                   |                      |                                          |
| 20    | 1             |                                   |                      |                                          |
| 25    | 1             |                                   |                      |                                          |
| 24    | 1             |                                   |                      |                                          |
| 19    | 1             |                                   |                      |                                          |
| 19    | 1             |                                   |                      |                                          |
| 27    | 1             |                                   |                      |                                          |
| 22    | 1             |                                   |                      |                                          |
| 18    | 1             |                                   |                      |                                          |
| 24    | 1             |                                   |                      |                                          |
| 19    | 1             |                                   |                      |                                          |
| 16    | 1             |                                   |                      |                                          |
| 32    | 0             |                                   |                      |                                          |
| 30    | 1             |                                   |                      |                                          |
| 25    | 1             |                                   |                      |                                          |
| 14    | 1             |                                   |                      |                                          |
| 22    | 1             |                                   |                      |                                          |
| 18    | 1             |                                   |                      |                                          |
| 22    | 1             |                                   |                      |                                          |
| 30    | 1             |                                   |                      |                                          |
| 24    | 1             |                                   |                      |                                          |
| 32    | 0             |                                   |                      |                                          |
| 15    | 1             |                                   |                      |                                          |
| 32    | 0             |                                   |                      |                                          |
| 20    | 1             |                                   |                      |                                          |
| 20    | 1             |                                   |                      |                                          |
| 22    | 1             |                                   |                      |                                          |
| 22    | 1             |                                   |                      |                                          |
| 22    | 1             |                                   |                      |                                          |
| 25    | 1             |                                   |                      |                                          |
| 25    | 1             |                                   |                      |                                          |
| 30    | 1             |                                   |                      |                                          |
| 27    | 1             |                                   |                      |                                          |
| 32    | 0             |                                   |                      |                                          |
| 27    | 1             |                                   |                      |                                          |
| 32    | 0             |                                   |                      |                                          |
| 27    | 1             |                                   |                      |                                          |
| 22    | 1             |                                   |                      |                                          |
| 20    | 1             |                                   |                      |                                          |
| 25    | 1             |                                   |                      |                                          |
| 18    | 1             |                                   |                      |                                          |
| 25    | 1             |                                   |                      |                                          |
| 20    |               | 1                                 |                      |                                          |
| 20    |               | 1                                 |                      |                                          |
| 28    |               | 1                                 |                      |                                          |
| 16    |               | 1                                 |                      |                                          |
| 24    |               | 1                                 |                      |                                          |
| 32    |               | 1                                 |                      |                                          |
| 16    |               | 1                                 |                      |                                          |
| 31    |               |                                   | 1                    |                                          |
| 21    |               |                                   | 1                    |                                          |
| 19    |               |                                   | 1                    |                                          |
| 24    |               |                                   | 1                    |                                          |
| 19    |               |                                   | 1                    |                                          |
| 27    |               |                                   | 1                    |                                          |
| 24    |               |                                   | 1                    |                                          |
| 27    |               |                                   | 1                    |                                          |
| 16    |               |                                   | 1                    |                                          |
| 18    |               |                                   | 1                    |                                          |
| 18    |               |                                   | 1                    |                                          |
| 27    |               |                                   | 1                    |                                          |
| 21    |               |                                   | 1                    |                                          |
| 31    |               |                                   | 1                    |                                          |
| 20    |               |                                   | 1                    |                                          |
| 32    |               |                                   | 0                    |                                          |
| 25    |               |                                   | 1                    |                                          |
| 25    |               |                                   | 1                    |                                          |
| 32    |               |                                   | 0                    |                                          |
| 20    |               |                                   | 1                    |                                          |
| 28    |               |                                   | 1                    |                                          |
| 25    |               |                                   | 1                    |                                          |
| 25    |               |                                   | 1                    |                                          |
| 25    |               |                                   | 1                    |                                          |
| 24    |               |                                   |                      | 1                                        |
| 16    |               |                                   |                      | 1                                        |
| 24    |               |                                   |                      | 1                                        |
| 16    |               |                                   |                      | 1                                        |
| 24    |               |                                   |                      | 1                                        |
| 20    |               |                                   |                      | 1                                        |
| 32    |               |                                   |                      | 0                                        |
| 16    |               |                                   |                      | 1                                        |
| 24    |               |                                   |                      | 1                                        |
| 16    |               |                                   |                      | 1                                        |
| 16    |               |                                   |                      | 1                                        |
