# Supplementary material for: Pathogen‐specific B‐cell receptors drive chronic lymphocytic leukemia by light‐chain‐dependent cross‐reaction with autoantigens
Source: EMBO Mol Med. 2017 Sep 12;9(11):1482–90. doi: 10.15252/emmm.201707732 (PMC5666309; doi:10.15252/emmm.201707732)
Supplement: Supplementary file 8 — Source Data for Figure 1A [file EMMM-9-1482-s006.pdf]

FIG 1A

[illegible][illegible]

| Weeks | KL25 + EpTCL1 |      |      |      |      |      |      |      |      |      |      |      |      |      |      |      |      |      |      |      |      |      |      |      |      |      |
|-------|---------------|------|------|------|------|------|------|------|------|------|------|------|------|------|------|------|------|------|------|------|------|------|------|------|------|------|
| 12    | 5.1           | 1.30 | 1.50 | 1.63 | 1.99 | 1.69 | 2.19 | 2.70 |      |      |      |      |      |      |      |      |      |      |      |      |      |      |      | 1.50 | 1.63 | 1.99 |
| 13    |               |      |      | 3.64 | 1.29 | 5.01 | 1.19 | 1.70 |      |      |      |      |      |      |      |      |      |      |      |      |      |      |      | 1.30 | 1.02 | 1.50 |
| 15    |               |      |      |      |      |      |      |      | 3.1  | 24.8 | 14   | 19.1 | 2.91 | 8.25 |      |      |      |      |      |      |      |      |      |      |      |      |
| 16    |               |      |      |      |      |      |      |      |      |      |      |      |      |      | 1.75 | 32.7 | 8.4  | 3.00 | 10   | 11.3 | 8.83 | 23.1 | 26.8 | 7    | 2.05 |      |
| 18    | 5.48          | 18.3 | 31.0 | 13.9 | 34.0 | 6.86 | 17.7 | 11.6 | 39.2 | 56.2 | 92.9 | 9.24 | 29.9 | 19.9 | 67.8 | 6.4  | 8.67 | 10   | 25.0 | 36.7 | 8.32 | 31.3 | 17.5 | 8.0  | 2.88 |      |
| 20    | 5.48          |      |      |      |      | 47.2 |      |      |      |      |      |      |      |      |      |      |      |      |      |      |      |      |      |      |      |      |
| 21    |               |      |      |      |      |      |      |      |      |      |      |      |      |      |      |      |      |      |      |      |      |      |      |      |      |      |
| 23    |               |      |      |      |      |      |      |      |      |      |      |      |      |      |      |      |      |      |      |      |      |      |      |      |      |      |
| 25    |               |      |      |      |      |      |      |      |      |      |      |      |      |      |      |      |      |      |      |      |      |      |      |      |      |      |
| 26    |               |      |      |      |      |      |      |      |      |      |      |      |      |      |      |      |      |      |      |      |      |      |      |      |      |      |
| 28    |               |      |      |      |      |      |      |      |      |      |      |      |      |      |      |      |      |      |      |      |      |      |      |      |      |      |
| 30    |               |      |      |      |      |      |      |      |      |      |      |      |      |      |      |      |      |      |      |      |      |      |      |      |      |      |
| 31    | 52.7          | 24.3 | 93   | 78   | 58.6 | 83.8 | 87.7 | 76   | 80.3 | 88.3 | 18.9 | 17.5 | 73.4 | 17.3 | 69   | 78.5 | 6.96 | 28.8 | 10   | 11.7 | 67.4 | 43.6 |      |      |      |      |
| 32    |               |      |      |      |      |      |      |      |      |      |      |      |      |      |      |      |      |      |      |      |      |      |      |      |      |      |
| 33    | 63.7          | 40.6 | 84.1 | 8.74 | 37.1 | 68.6 |      | 60.3 | 22.1 |      |      |      |      |      | 85.2 | 48.5 |      | 33.4 | 22.1 | 96.6 |      | 50.2 | 17.3 |      |      |      |

[illegible][illegible]
