# Supplementary material for: Pathogen‐specific B‐cell receptors drive chronic lymphocytic leukemia by light‐chain‐dependent cross‐reaction with autoantigens
Source: EMBO Mol Med. 2017 Sep 12;9(11):1482–90. doi: 10.15252/emmm.201707732 (PMC5666309; doi:10.15252/emmm.201707732)
Supplement: Supplementary file 9 — Source Data for Figure 1B [file EMMM-9-1482-s007.pdf]

**FIG 1B**

| Weeks | WT | E $\mu$ -TCL1 | KL25 x E $\mu$ -TCL1 | VI10Yen x E $\mu$ -TCL1 | DHLMP2A x E $\mu$ -TCL1 |
|-------|----|---------------|----------------------|-------------------------|-------------------------|
| 36    | 0  |               |                      |                         |                         |
| 36    | 0  |               |                      |                         |                         |
| 36    | 0  |               |                      |                         |                         |
| 36    | 0  |               |                      |                         |                         |
| 36    | 0  |               |                      |                         |                         |
| 36    | 0  |               |                      |                         |                         |
| 36    | 0  |               |                      |                         |                         |
| 36    | 0  |               |                      |                         |                         |
| 36    | 0  |               |                      |                         |                         |
| 36    | 0  |               |                      |                         |                         |
| 36    | 0  |               |                      |                         |                         |
| 36    | 0  |               |                      |                         |                         |
| 36    | 0  |               |                      |                         |                         |
| 36    | 0  |               |                      |                         |                         |
| 36    | 0  |               |                      |                         |                         |
| 36    | 0  |               |                      |                         |                         |
| 36    | 0  |               |                      |                         |                         |
| 36    | 0  |               |                      |                         |                         |
| 22    |    | 1             |                      |                         |                         |
| 24    |    | 1             |                      |                         |                         |
| 21    |    | 1             |                      |                         |                         |
| 24    |    | 1             |                      |                         |                         |
| 22    |    | 1             |                      |                         |                         |
| 20    |    | 1             |                      |                         |                         |
| 20    |    | 1             |                      |                         |                         |
| 25    |    | 1             |                      |                         |                         |
| 24    |    | 1             |                      |                         |                         |
| 19    |    | 1             |                      |                         |                         |
| 19    |    | 1             |                      |                         |                         |
| 27    |    | 1             |                      |                         |                         |
| 22    |    | 1             |                      |                         |                         |
| 18    |    | 1             |                      |                         |                         |
| 24    |    | 1             |                      |                         |                         |
| 19    |    | 1             |                      |                         |                         |
| 16    |    | 1             |                      |                         |                         |
| 36    |    | 1             |                      |                         |                         |
| 30    |    | 1             |                      |                         |                         |
| 25    |    | 1             |                      |                         |                         |
| 14    |    | 1             |                      |                         |                         |
| 22    |    | 1             |                      |                         |                         |
| 18    |    | 1             |                      |                         |                         |
| 22    |    | 1             |                      |                         |                         |
| 30    |    | 1             |                      |                         |                         |
| 24    |    | 1             |                      |                         |                         |
| 34    |    | 1             |                      |                         |                         |
| 15    |    | 1             |                      |                         |                         |
| 36    |    | 1             |                      |                         |                         |
| 20    |    | 1             |                      |                         |                         |
| 20    |    | 1             |                      |                         |                         |
| 22    |    | 1             |                      |                         |                         |
| 22    |    | 1             |                      |                         |                         |
| 22    |    | 1             |                      |                         |                         |
| 25    |    | 1             |                      |                         |                         |
| 25    |    | 1             |                      |                         |                         |
| 30    |    | 1             |                      |                         |                         |
| 27    |    | 1             |                      |                         |                         |
| 35    |    | 1             |                      |                         |                         |
| 27    |    | 1             |                      |                         |                         |
| 35    |    | 1             |                      |                         |                         |
| 27    |    | 1             |                      |                         |                         |
| 22    |    | 1             |                      |                         |                         |
| 20    |    | 1             |                      |                         |                         |
| 25    |    | 1             |                      |                         |                         |
| 18    |    | 1             |                      |                         |                         |
| 25    |    | 1             |                      |                         |                         |
| 31    |    |               | 1                    |                         |                         |
| 21    |    |               | 1                    |                         |                         |
| 19    |    |               | 1                    |                         |                         |
| 24    |    |               | 1                    |                         |                         |
| 19    |    |               | 1                    |                         |                         |
| 27    |    |               | 1                    |                         |                         |
| 24    |    |               | 1                    |                         |                         |
| 27    |    |               | 1                    |                         |                         |
| 18    |    |               | 1                    |                         |                         |
| 18    |    |               | 1                    |                         |                         |
| 21    |    |               | 1                    |                         |                         |
| 31    |    |               | 1                    |                         |                         |
| 36    |    |               | 1                    |                         |                         |
| 31    |    |               | 1                    |                         |                         |
| 35    |    |               | 1                    |                         |                         |
| 25    |    |               | 1                    |                         |                         |
| 25    |    |               | 1                    |                         |                         |
| 25    |    |               | 1                    |                         |                         |
| 36    |    |               | 0                    |                         |                         |
| 20    |    |               | 1                    |                         |                         |
| 28    |    |               | 1                    |                         |                         |
| 31    |    |               | 0                    |                         |                         |
| 25    |    |               | 1                    |                         |                         |
| 25    |    |               | 1                    |                         |                         |
| 25    |    |               | 1                    |                         |                         |
| 29    |    |               |                      | 1                       |                         |
| 29    |    |               |                      | 1                       |                         |
| 36    |    |               |                      | 0                       |                         |
| 36    |    |               |                      | 0                       |                         |
| 30    |    |               |                      | 1                       |                         |
| 36    |    |               |                      | 0                       |                         |
| 36    |    |               |                      | 0                       |                         |
| 36    |    |               |                      | 1                       |                         |
| 29    |    |               |                      | 1                       |                         |
| 36    |    |               |                      | 0                       |                         |
| 35    |    |               |                      | 0                       |                         |
| 29    |    |               |                      | 1                       |                         |
| 34    |    |               |                      | 1                       |                         |
| 36    |    |               |                      | 0                       |                         |
| 34    |    |               |                      | 0                       |                         |
| 25    |    |               |                      | 1                       |                         |
| 36    |    |               |                      | 0                       |                         |
| 29    |    |               |                      | 1                       |                         |
| 34    |    |               |                      | 1                       |                         |
| 31    |    |               |                      | 1                       |                         |
| 36    |    |               |                      |                         | 0                       |
| 36    |    |               |                      |                         | 0                       |
| 36    |    |               |                      |                         | 0                       |
| 36    |    |               |                      |                         | 0                       |
| 36    |    |               |                      |                         | 0                       |
| 36    |    |               |                      |                         | 1                       |
| 36    |    |               |                      |                         | 0                       |
| 36    |    |               |                      |                         | 0                       |
| 36    |    |               |                      |                         | 0                       |
| 36    |    |               |                      |                         | 0                       |
| 36    |    |               |                      |                         | 0                       |
| 36    |    |               |                      |                         | 0                       |
| 36    |    |               |                      |                         | 0                       |
| 36    |    |               |                      |                         | 0                       |
| 36    |    |               |                      |                         | 0                       |
| 36    |    |               |                      |                         | 0                       |
| 36    |    |               |                      |                         | 0                       |
| 36    |    |               |                      |                         | 0                       |
| 36    |    |               |                      |                         | 0                       |
| 36    |    |               |                      |                         | 0                       |
| 36    |    |               |                      |                         | 0                       |
| 36    |    |               |                      |                         | 0                       |
| 36    |    |               |                      |                         | 0                       |
| 36    |    |               |                      |                         | 0                       |
| 36    |    |               |                      |                         | 0                       |
| 36    |    |               |                      |                         | 0                       |
| 36    |    |               |                      |                         | 0                       |
| 36    |    |               |                      |                         | 0                       |
| 36    |    |               |                      |                         | 0                       |
| 36    |    |               |                      |                         | 0                       |
| 36    |    |               |                      |                         | 0                       |
| 36    |    |               |                      |                         | 0                       |
| 36    |    |               |                      |                         | 0                       |
| 36    |    |               |                      |                         | 0                       |
| 36    |    |               |                      |                         | 0                       |
| 36    |    |               |                      |                         | 0                       |
| 36    |    |               |                      |                         | 0                       |
| 36    |    |               |                      |                         | 0                       |
| 36    |    |               |                      |                         | 0                       |
| 36    |    |               |                      |                         | 0                       |
| 36    |    |               |                      |                         | 0                       |
| 36    |    |               |                      |                         | 0                       |
| 36    |    |               |                      |                         | 0                       |
| 36    |    |               |                      |                         | 0                       |
| 36    |    |               |                      |                         | 0                       |
| 36    |    |               |                      |                         | 0                       |
| 36    |    |               |                      |                         | 0                       |
| 36    |    |               |                      |                         | 0                       |
| 36    |    |               |                      |                         | 0                       |
| 36    |    |               |                      |                         | 0                       |
| 36    |    |               |                      |                         | 0                       |
| 36    |    |               |                      |                         | 0                       |
| 36    |    |               |                      |                         | 0                       |
| 36    |    |               |                      |                         | 0                       |
| 36    |    |               |                      |                         | 0                       |
| 36    |    |               |                      |                         | 0                       |
| 36    |    |               |                      |                         | 0                       |
| 36    |    |               |                      |                         | 0                       |
| 36    |    |               |                      |                         | 0                       |
| 36    |    |               |                      |                         | 0                       |
| 36    |    |               |                      |                         | 0                       |
| 36    |    |               |                      |                         | 0                       |
| 36    |    |               |                      |                         | 0                       |
| 36    |    |               |                      |                         | 0                       |
| 36    |    |               |                      |                         | 0                       |
| 36    |    |               |                      |                         | 0                       |
| 36    |    |               |                      |                         | 0                       |
| 36    |    |               |                      |                         | 0                       |
| 36    |    |               |                      |                         | 0                       |
| 36    |    |               |                      |                         | 0                       |
| 36    |    |               |                      |                         | 0                       |
| 36    |    |               |                      |                         | 0                       |
| 36    |    |               |                      |                         | 0                       |
| 36    |    |               |                      |                         | 0                       |
| 36    |    |               |                      |                         | 0                       |
| 36    |    |               |                      |                         | 0                       |
| 36    |    |               |                      |                         | 0                       |
| 36    |    |               |                      |                         | 0                       |
| 36    |    |               |                      |                         | 0                       |
| 36    |    |               |                      |                         | 0                       |
| 36    |    |               |                      |                         | 0                       |
| 36    |    |               |                      |                         | 0                       |
| 36    |    |               |                      |                         | 0                       |
| 36    |    |               |                      |                         | 0                       |
| 36    |    |               |                      |                         | 0                       |
| 36    |    |               |                      |                         | 0                       |
| 36    |    |               |                      |                         | 0                       |
| 36    |    |               |                      |                         | 0                       |
| 36    |    |               |                      |                         | 0                       |
| 36    |    |               |                      |                         | 0                       |
| 36    |    |               |                      |                         | 0                       |
| 36    |    |               |                      |                         | 0                       |
| 36    |    |               |                      |                         | 0                       |
| 36    |    |               |                      |                         | 0                       |
| 36    |    |               |                      |                         | 0                       |
| 36    |    |               |                      |                         | 0                       |
| 36    |    |               |                      |                         | 0                       |
| 36    |    |               |                      |                         | 0                       |
| 36    |    |               |                      |                         | 0                       |
| 36    |    |               |                      |                         | 0                       |
| 36    |    |               |                      |                         | 0                       |
| 36    |    |               |                      |                         | 0                       |
| 36    |    |               |                      |                         | 0                       |
| 36    |    |               |                      |                         | 0                       |
| 36    |    |               |                      |                         | 0                       |
| 36    |    |               |                      |                         | 0</                     |
