# Supplementary material for: Pathogen‐specific B‐cell receptors drive chronic lymphocytic leukemia by light‐chain‐dependent cross‐reaction with autoantigens
Source: EMBO Mol Med. 2017 Sep 12;9(11):1482–90. doi: 10.15252/emmm.201707732 (PMC5666309; doi:10.15252/emmm.201707732)
Supplement: Supplementary file 11 — Source Data for Figure 2A [file EMMM-9-1482-s009.pdf]

FIG 2A

| Weeks | EgTOL1 |      |      |      |      |      |      |      |      |      |       |      |      |      |     |      |      |  |  |  |
|-------|--------|------|------|------|------|------|------|------|------|------|-------|------|------|------|-----|------|------|--|--|--|
| 12    | 4.69   | 8.90 | 3.21 | 5    |      |      |      |      |      | 4.38 | 5.99  | 3.79 | 7.93 |      |     |      |      |  |  |  |
| 13    |        |      |      |      |      |      |      |      |      | 7.83 | 8.88  |      | 4.78 | 6.13 | 5.3 | 7.62 | 18.4 |  |  |  |
| 14    |        |      |      |      |      |      |      |      |      | 7.7  | 14.18 | 3.27 | 4.82 |      |     |      |      |  |  |  |
| 15    | 13.3   | 12   |      |      |      |      |      |      |      |      |       |      |      |      |     |      |      |  |  |  |
| 16    |        |      |      |      |      |      |      |      |      |      |       |      |      |      |     |      |      |  |  |  |
| 17    |        |      |      |      |      |      |      |      |      |      |       |      |      |      |     |      |      |  |  |  |
| 18    | 23.3   | 32   | 6.98 | 11.3 | 24.4 | 46.3 | 18.9 | 8.75 | 18.8 | 42.3 | 24    | 24.3 |      |      |     |      |      |  |  |  |
| 19    |        |      |      |      |      |      |      |      |      |      |       |      |      |      |     |      |      |  |  |  |
| 20    | 23.3   | 32   | 32   | 21.9 | 28.6 | 68.3 | 11.5 | 8.39 |      |      |       |      |      |      |     |      |      |  |  |  |
| 21    |        |      |      |      |      |      |      |      |      |      |       |      |      |      |     |      |      |  |  |  |
| 22    | 53.4   | 63.4 | 21.5 | 19.7 | 33.2 |      | 20   |      |      |      |       |      |      |      |     |      |      |  |  |  |
| 23    |        |      |      |      |      |      |      |      |      |      |       |      |      |      |     |      |      |  |  |  |
| 24    | 53.4   | 63.4 | 21.5 | 19.7 | 33.2 |      | 20   |      |      |      |       |      |      |      |     |      |      |  |  |  |
| 25    |        |      |      |      |      |      |      |      |      |      |       |      |      |      |     |      |      |  |  |  |
| 26    | 53.4   | 63.4 | 21.5 | 19.7 | 33.2 |      | 20   |      |      |      |       |      |      |      |     |      |      |  |  |  |
| 27    |        |      |      |      |      |      |      |      |      |      |       |      |      |      |     |      |      |  |  |  |
| 28    | 53.4   | 63.4 | 21.5 | 19.7 | 33.2 |      | 20   |      |      |      |       |      |      |      |     |      |      |  |  |  |
| 29    |        |      |      |      |      |      |      |      |      |      |       |      |      |      |     |      |      |  |  |  |
| 30    | 53.4   | 63.4 | 21.5 | 19.7 | 33.2 |      | 20   |      |      |      |       |      |      |      |     |      |      |  |  |  |
| 31    |        |      |      |      |      |      |      |      |      |      |       |      |      |      |     |      |      |  |  |  |
| 32    | 53.4   | 63.4 | 21.5 | 19.7 | 33.2 |      | 20   |      |      |      |       |      |      |      |     |      |      |  |  |  |
| 33    |        |      |      |      |      |      |      |      |      |      |       |      |      |      |     |      |      |  |  |  |
| 34    | 53.4   | 63.4 | 21.5 | 19.7 | 33.2 |      | 20   |      |      |      |       |      |      |      |     |      |      |  |  |  |
| 35    |        |      |      |      |      |      |      |      |      |      |       |      |      |      |     |      |      |  |  |  |
| 36    | 53.4   | 63.4 | 21.5 | 19.7 | 33.2 |      | 20   |      |      |      |       |      |      |      |     |      |      |  |  |  |
| 37    |        |      |      |      |      |      |      |      |      |      |       |      |      |      |     |      |      |  |  |  |
| 38    | 53.4   | 63.4 | 21.5 | 19.7 | 33.2 |      | 20   |      |      |      |       |      |      |      |     |      |      |  |  |  |
| 39    |        |      |      |      |      |      |      |      |      |      |       |      |      |      |     |      |      |  |  |  |
| 40    | 53.4   | 63.4 | 21.5 | 19.7 | 33.2 |      | 20   |      |      |      |       |      |      |      |     |      |      |  |  |  |
| 41    |        |      |      |      |      |      |      |      |      |      |       |      |      |      |     |      |      |  |  |  |
| 42    | 53.4   | 63.4 | 21.5 | 19.7 | 33.2 |      | 20   |      |      |      |       |      |      |      |     |      |      |  |  |  |
| 43    |        |      |      |      |      |      |      |      |      |      |       |      |      |      |     |      |      |  |  |  |
| 44    | 53.4   | 63.4 | 21.5 | 19.7 | 33.2 |      | 20   |      |      |      |       |      |      |      |     |      |      |  |  |  |
| 45    |        |      |      |      |      |      |      |      |      |      |       |      |      |      |     |      |      |  |  |  |
| 46    | 53.4   | 63.4 | 21.5 | 19.7 | 33.2 |      | 20   |      |      |      |       |      |      |      |     |      |      |  |  |  |
| 47    |        |      |      |      |      |      |      |      |      |      |       |      |      |      |     |      |      |  |  |  |
| 48    | 53.4   | 63.4 | 21.5 | 19.7 | 33.2 |      | 20   |      |      |      |       |      |      |      |     |      |      |  |  |  |
| 49    |        |      |      |      |      |      |      |      |      |      |       |      |      |      |     |      |      |  |  |  |
| 50    | 53.4   | 63.4 | 21.5 | 19.7 | 33.2 |      | 20   |      |      |      |       |      |      |      |     |      |      |  |  |  |
| 51    |        |      |      |      |      |      |      |      |      |      |       |      |      |      |     |      |      |  |  |  |
| 52    | 53.4   | 63.4 | 21.5 | 19.7 | 33.2 |      | 20   |      |      |      |       |      |      |      |     |      |      |  |  |  |
| 53    |        |      |      |      |      |      |      |      |      |      |       |      |      |      |     |      |      |  |  |  |
| 54    | 53.4   | 63.4 | 21.5 | 19.7 | 33.2 |      | 20   |      |      |      |       |      |      |      |     |      |      |  |  |  |
| 55    |        |      |      |      |      |      |      |      |      |      |       |      |      |      |     |      |      |  |  |  |
| 56    | 53.4   | 63.4 | 21.5 | 19.7 | 33.2 |      | 20   |      |      |      |       |      |      |      |     |      |      |  |  |  |
| 57    |        |      |      |      |      |      |      |      |      |      |       |      |      |      |     |      |      |  |  |  |
| 58    | 53.4   | 63.4 | 21.5 | 19.7 | 33.2 |      | 20   |      |      |      |       |      |      |      |     |      |      |  |  |  |
| 59    |        |      |      |      |      |      |      |      |      |      |       |      |      |      |     |      |      |  |  |  |
| 60    | 53.4   | 63.4 | 21.5 | 19.7 | 33.2 |      | 20   |      |      |      |       |      |      |      |     |      |      |  |  |  |
| 61    |        |      |      |      |      |      |      |      |      |      |       |      |      |      |     |      |      |  |  |  |
| 62    | 53.4   | 63.4 | 21.5 | 19.7 | 33.2 |      | 20   |      |      |      |       |      |      |      |     |      |      |  |  |  |
| 63    |        |      |      |      |      |      |      |      |      |      |       |      |      |      |     |      |      |  |  |  |
| 64    | 53.4   | 63.4 | 21.5 | 19.7 | 33.2 |      | 20   |      |      |      |       |      |      |      |     |      |      |  |  |  |
| 65    |        |      |      |      |      |      |      |      |      |      |       |      |      |      |     |      |      |  |  |  |
| 66    | 53.4   | 63.4 | 21.5 | 19.7 | 33.2 |      | 20   |      |      |      |       |      |      |      |     |      |      |  |  |  |
| 67    |        |      |      |      |      |      |      |      |      |      |       |      |      |      |     |      |      |  |  |  |
| 68    | 53.4   | 63.4 | 21.5 | 19.7 | 33.2 |      | 20   |      |      |      |       |      |      |      |     |      |      |  |  |  |
| 69    |        |      |      |      |      |      |      |      |      |      |       |      |      |      |     |      |      |  |  |  |
| 70    | 53.4   | 63.4 | 21.5 | 19.7 | 33.2 |      | 20   |      |      |      |       |      |      |      |     |      |      |  |  |  |
| 71    |        |      |      |      |      |      |      |      |      |      |       |      |      |      |     |      |      |  |  |  |
| 72    | 53.4   | 63.4 | 21.5 | 19.7 | 33.2 |      | 20   |      |      |      |       |      |      |      |     |      |      |  |  |  |
| 73    |        |      |      |      |      |      |      |      |      |      |       |      |      |      |     |      |      |  |  |  |
| 74    | 53.4   | 63.4 | 21.5 | 19.7 | 33.2 |      | 20   |      |      |      |       |      |      |      |     |      |      |  |  |  |
| 75    |        |      |      |      |      |      |      |      |      |      |       |      |      |      |     |      |      |  |  |  |
| 76    | 53.4   | 63.4 | 21.5 | 19.7 | 33.2 |      | 20   |      |      |      |       |      |      |      |     |      |      |  |  |  |
| 77    |        |      |      |      |      |      |      |      |      |      |       |      |      |      |     |      |      |  |  |  |
| 78    | 53.4   | 63.4 | 21.5 | 19.7 | 33.2 |      | 20   |      |      |      |       |      |      |      |     |      |      |  |  |  |
| 79    |        |      |      |      |      |      |      |      |      |      |       |      |      |      |     |      |      |  |  |  |
| 80    | 53.4   | 63.4 | 21.5 | 19.7 | 33.2 |      | 20   |      |      |      |       |      |      |      |     |      |      |  |  |  |
| 81    |        |      |      |      |      |      |      |      |      |      |       |      |      |      |     |      |      |  |  |  |
| 82    | 53.4   | 63.4 | 21.5 | 19.7 | 33.2 |      | 20   |      |      |      |       |      |      |      |     |      |      |  |  |  |
| 83    |        |      |      |      |      |      |      |      |      |      |       |      |      |      |     |      |      |  |  |  |
| 84    | 53.4   | 63.4 | 21.5 | 19.7 | 33.2 |      | 20   |      |      |      |       |      |      |      |     |      |      |  |  |  |
| 85    |        |      |      |      |      |      |      |      |      |      |       |      |      |      |     |      |      |  |  |  |
| 86    | 53.4   | 63.4 | 21.5 | 19.7 | 33.2 |      | 20   |      |      |      |       |      |      |      |     |      |      |  |  |  |
| 87    |        |      |      |      |      |      |      |      |      |      |       |      |      |      |     |      |      |  |  |  |
| 88    | 53.4   | 63.4 | 21.5 | 19.7 | 33.2 |      | 20   |      |      |      |       |      |      |      |     |      |      |  |  |  |
| 89    |        |      |      |      |      |      |      |      |      |      |       |      |      |      |     |      |      |  |  |  |
| 90    | 53.4   | 63.4 | 21.5 | 19.7 | 33.2 |      | 20   |      |      |      |       |      |      |      |     |      |      |  |  |  |
| 91    |        |      |      |      |      |      |      |      |      |      |       |      |      |      |     |      |      |  |  |  |
| 92    | 53.4   | 63.4 | 21.5 | 19.7 | 33.2 |      | 20   |      |      |      |       |      |      |      |     |      |      |  |  |  |
| 93    |        |      |      |      |      |      |      |      |      |      |       |      |      |      |     |      |      |  |  |  |
| 94    | 53.4   | 63.4 | 21.5 | 19.7 | 33.2 |      | 20   |      |      |      |       |      |      |      |     |      |      |  |  |  |
| 95    |        |      |      |      |      |      |      |      |      |      |       |      |      |      |     |      |      |  |  |  |
| 96    | 53.4   | 63.4 | 21.5 | 19.7 | 33.2 |      | 20   |      |      |      |       |      |      |      |     |      |      |  |  |  |
| 97    |        |      |      |      |      |      |      |      |      |      |       |      |      |      |     |      |      |  |  |  |
| 98    | 53.4   | 63.4 | 21.5 | 19.7 | 33.2 |      | 20   |      |      |      |       |      |      |      |     |      |      |  |  |  |
| 99    |        |      |      |      |      |      |      |      |      |      |       |      |      |      |     |      |      |  |  |  |
| 100   | 53.4   | 63.4 | 21.5 | 19.7 | 33.2 |      | 20   |      |      |      |       |      |      |      |     |      |      |  |  |  |
| 101   |        |      |      |      |      |      |      |      |      |      |       |      |      |      |     |      |      |  |  |  |
| 102   | 53.4   | 63.4 | 21.5 | 19.7 | 33.2 |      | 20   |      |      |      |       |      |      |      |     |      |      |  |  |  |
| 103   |        |      |      |      |      |      |      |      |      |      |       |      |      |      |     |      |      |  |  |  |
| 104   | 53.4   | 63.4 | 21.5 | 19.7 | 33.2 |      | 20   |      |      |      |       |      |      |      |     |      |      |  |  |  |
| 105   |        |      |      |      |      |      |      |      |      |      |       |      |      |      |     |      |      |  |  |  |
| 106   | 53.4   | 63.4 | 21.5 | 19.7 | 33.2 |      | 20   |      |      |      |       |      |      |      |     |      |      |  |  |  |
| 107   |        |      |      |      |      |      |      |      |      |      |       |      |      |      |     |      |      |  |  |  |
| 108   | 53.4   | 63.4 | 21.5 | 19.7 | 33.2 |      | 20   |      |      |      |       |      |      |      |     |      |      |  |  |  |
| 109   |        |      |      |      |      |      |      |      |      |      |       |      |      |      |     |      |      |  |  |  |
| 110   | 53.4   | 63.4 | 21.5 | 19.7 | 33.2 |      | 20   |      |      |      |       |      |      |      |     |      |      |  |  |  |
| 111   |        |      |      |      |      |      |      |      |      |      |       |      |      |      |     |      |      |  |  |  |
| 112   | 53.4   | 63.4 | 21.5 | 19.7 | 33.2 |      | 20   |      |      |      |       |      |      |      |     |      |      |  |  |  |
| 113   |        |      |      |      |      |      |      |      |      |      |       |      |      |      |     |      |      |  |  |  |
| 114   | 53.4   | 63.4 | 21.5 | 19.7 | 33.2 |      | 20   |      |      |      |       |      |      |      |     |      |      |  |  |  |
| 115   |        |      |      |      |      |      |      |      |      |      |       |      |      |      |     |      |      |  |  |  |
| 116   | 53.4   | 63.4 | 21.5 | 19.7 | 33.2 |      | 20   |      |      |      |       |      |      |      |     |      |      |  |  |  |
| 117   |        |      |      |      |      |      |      |      |      |      |       |      |      |      |     |      |      |  |  |  |
| 118   | 53.4   | 63.4 | 21.5 | 19.7 | 33.2 |      | 20   |      |      |      |       |      |      |      |     |      |      |  |  |  |
| 119   |        |      |      |      |      |      |      |      |      |      |       |      |      |      |     |      |      |  |  |  |
| 120   | 53.4   | 63.4 | 21.5 | 19.7 | 33.2 |      | 20   |      |      |      |       |      |      |      |     |      |      |  |  |  |
| 121   |        |      |      |      |      |      |      |      |      |      |       |      |      |      |     |      |      |  |  |  |
| 122   | 53.4   | 63.4 | 21.5 | 19.7 | 33.2 |      | 20   |      |      |      |       |      |      |      |     |      |      |  |  |  |
| 123   |        |      |      |      |      |      |      |      |      |      |       |      |      |      |     |      |      |  |  |  |
| 124   | 53.4   | 63.4 | 21.5 | 19.7 | 33.2 |      | 20   |      |      |      |       |      |      |      |     |      |      |  |  |  |
| 125   |        |      |      |      |      |      |      |      |      |      |       |      |      |      |     |      |      |  |  |  |
| 126   | 53.4   | 63.4 | 21.5 | 19.7 | 33.2 |      | 20   |      |      |      |       |      |      |      |     |      |      |  |  |  |
| 127   |        |      |      |      |      |      |      |      |      |      |       |      |      |      |     |      |      |  |  |  |
| 128   | 53.4   | 63.4 | 21.5 | 19.7 | 33.2 |      | 20   |      |      |      |       |      |      |      |     |      |      |  |  |  |

[illegible]

| Weeks | Exp.TCL1 + VSB |      |      |       |      |      |      |      |      |      |
|-------|----------------|------|------|-------|------|------|------|------|------|------|
| 8     | 1.79           | 1.69 | 1.7  | 0.360 | 4.17 | 1.08 | 3.03 | 2.95 |      |      |
| 12    | 5.14           | 5.37 | 3.26 | 6.48  | 6    |      | 2.26 | 4.15 | 2.92 | 3.17 |
| 16    | 6.5            | 9    | 4.73 | 20.6  | 10.7 |      | 3.61 | 5.28 | 2.37 | 2.98 |
| 20    | 12.6           | 20.8 | 5.58 | 41    | 29.4 |      | 8.63 | 6.82 | 4.12 | 6.3  |
| 24    | 20.2           | 38.1 | 6.1  | 68    | 58.8 |      | 10.7 | 13.2 | 8.43 | 18   |
| 28    | 26.8           | 44.4 | 8.75 | 80.8  | 70   |      | 14   | 22.6 | 7.62 | 16   |
| 32    | 34.2           | 59.3 | 13.9 | 97.1  | 40.7 |      | 18.9 | 84.8 | 30   | 18.7 |
| 36    | 63             | 85.8 | 11.9 | 97.1  |      |      | 42.3 |      | 77.1 | 63.8 |

| Weeks | VITeX + E <sub>1</sub> + TCTL1 + VS <sub>1</sub> |      |      |      |      |       |       |       |       |  |
|-------|--------------------------------------------------|------|------|------|------|-------|-------|-------|-------|--|
| 8     | 1.29                                             | 1.38 | 1.4  | 1.97 | 1.43 | 1.07  | 0.907 | 0.901 | 0.956 |  |
| 12    | 2.64                                             | 6.34 | 3.52 | 4.96 | 3.86 | 1.64  | 1.37  | 1.92  |       |  |
| 16    | 2.64                                             | 5.29 | 16.2 | 5.83 | 5.35 | 1.45  | 2.48  | 1.92  |       |  |
| 20    | 21                                               | 2.19 | 7.54 |      | 19.5 | 0     | 1.87  | 4.51  | 2.72  |  |
| 24    | 2.64                                             | 5.23 | 9.14 |      | 32.7 | 8.44  | 1.74  | 6.45  | 2.08  |  |
| 28    | 0.488                                            | 7.53 |      |      | 10.0 | 0.868 | 8.8   | 0.909 |       |  |
| 32    | 2.2                                              | 16.7 |      | 40.4 | 13.6 | 1.49  | 38.8  | 2.02  |       |  |
| 36    | 3.2                                              | 36.5 |      | 86   | 39.2 | 7.15  | 88.7  | 12.3  |       |  |
